# Supplementary material for: Quantitative RT-PCR based platform for rapid quantification of the transcripts of highly homologous multigene families and their members during grain development
Source: PubMed Central journal article supplement (PMC3492166; doi:10.1186/1471-2229-12-184), 2012-10-09
Supplement: 1471-2229-12-184-S1.pdf [file 1471-2229-12-184-S1.pdf]

**B**

JQ859917 CCACCATTTGGGCTACAACAACCAATTCTATCGCAGCAACAACCATGTACACCACAACAA 60  
 JQ867075 CCACCATTTGGGCTACAACAACCAATTCTATCGCAGCAACAACCATGTACACCACAACAA 60  
 JQ867074 CCACCATTTGGGCTACAACAACCAATTCTATCGCAGCAACAACCATGTACACCACAACAA 60  
 JQ859915 CCACCATTTGGGCTACAACAACCAATTCTATCGCAGCAACAACCATGTACACCACAACAA 60  
 X53690 CCACCATTTGGGCTACAACAACCAATTCTATCGCAGCAACAACCATGTACACCACAACAA 60  
 JQ867081 CCACCATTTGGGCTACAACAACGAATTCTATCGCAGCAACAACCATGTACACCACAACAA 60  
 JQ867083 CCACCATTTGGGCTACAACAACGAATTCTATCGCAGCAACAACCATGTACACCACAACAA 60  
 JQ867082 CCACCATTTGGGCTACAACAACGAATTCTATCGCAGCAACAACCATGTACACCACAACAA 60  
 JQ867084 CCACCATTTGGGCTACAACAACCAATTCTATCGCAGCAACAACCATGTACACCACAACAA 60  
 DQ178602 CCACCATTTGGGCTACAACAACCAATTCTATGGCAGCAACAACCATGTACACCACAACAA 60  
 DQ267479 CCACCATTTGGGCTACAACAACCAATTCTATGGCAGCAACAACCATGTACACCACAACAA 60  
 JQ867073 CCACCATTTGGGCTACAACAACCAATTCTATCGCAGCAACAACCATGTACACCACAACAA 60

**X87232\_FW** →

X87232 CCACCATTTGGGCTACAACAACCAATTCTATCGCAACAACAACCATGTACACCACAACA 60  
 JQ859916 CCACCATTTGGGCTACAACAACCAATTCTATCGCAACAACAACCATGTACACCACAACAA 60  
 DQ148297 CCACCATTTGGGCTACAACAACCGATTCTATCGCAACAACAACCATGTACACCACAACAA 60  
 X03103 CCACCATTTGGGCTACAACAACCAATTCTATCGCAGCAACAACCATGTACACCACAACAA 60  
 JQ867086 CCACCATTTGGGCTACAACAACCAAGTTCTATCGCAGCAACAACCATGTACACAAGAACAA 60  
 JQ867087 CCACCATTTGGGCTACAACAACCAAGTTCTATCGCAGCAACAACCATGTACACAAGAACAA 60  
 JQ867089 CCACCATTTGGGCTACAACAACCAAGTTCTATCGCAGCAACAACCATGTACACAAGAACAA 60  
 JQ867085 CCACCATTTGGGCTACAACAACCAAGTTCTATCGCAGCAACAACCATGTACACAAGAACAA 60  
 GQ342970 CCACCATTTGGGCTACAACAACCAAGTTCTATCGCAGCAACAACCATGTACACAAGAACAA 60  
 GQ342971 CCACCATTTGGGCTACAACAACCAAGTTCTATCGCAGCAACAACCATGTACACAAGAACAA 60  
 DQ267478 CCACCATTTGGGCTACAACAACCAAGTTCTATCGCAGCAACAACCATGTACACAAGAACAA 60  
 GQ342972 CCACCATTTGGGCTACAACAACCAAGTTCTATCGCAGCAACAACCATGTACACAAGAACAA 60  
 GQ342976 CCACCATTTGGGCTACAACAACCAAGTTCTATCGCAGCAACAACCATGTACACAAGAACAA 60  
 GQ342973 CCACCATTTGGGCTACAACAACCAAGTTCTATCGCAGCAACAACCATGTACACAAGAACAA 60  
 GQ342975 CCACCATTTGGGCTACAACAACCAATTCTATCGAAGCAACAACCATGTACACCACAACAA 60  
 JQ867088 CCACCATTTGGGCTACAACAACCAAGTTCTATCGCAGCAACAACCATGTACACCACAACAA 60  
 DQ826387 CCACCATTTGGGCTACAACAACCAAGTTCTATCGCAGCAACAACCATGTACACAAGAACAA 60

\* \* \* \* \*

JQ859917 ACACCCTCCCACAAGGACAACCTGTATCAAACGCTTCTGCAACTACAATAACCCCTATGTT 120  
 JQ867075 ACACCCTCCCACAAGGACAACCTGTATCAAACGCTTCTGCAACTACAATAACCCCTATGTT 120  
 JQ867074 ACACCCTCCCACAAGGACAACCTGTATCAAACGCTTCTGCAACTACAATAACCCCTATGTT 120  
 JQ859915 ACACCCTCCCACAAGGACAACCTGTATCAAACGCTTCTGCAACTACAATAACCCCTATGTT 120  
 X53690 ACACCCTCCCACAAGGACAACCTGTATCAAACGCTTCTGCAACTACAATAACCCCTATGTT 120  
 JQ867081 ACACCCTCCCACAAGGACAACCTGTATCAAACGCTTCTGCAACTACAATAACCCCTATGTT 120  
 JQ867083 ACACCCTCCCACAAGGACAACCTGTATCAAACGCTTCTGCAACTACAATAACCCCTATGTT 120  
 JQ867082 ACACCCTCCCACAAGGACAACCTGTATCAAACGCTTCTGCAACTACAATAACCCCTATGTT 120  
 JQ867084 ACACCCTCCCACAAGGACAACAAGATCAAATGCTTGTGCAAGTACAATAACCATTTGTT 120  
 DQ178602 ACACCCTCCCACAAGGACAACCTGTATCAAACGCTTCTGCAACTACAATAACCCCTATGTT 120  
 DQ267479 ACACCCTCCCACAAGGACAACCTGTATCAAACGCTTCTGCAACTACAATAACCCCTATGTT 120  
 JQ867073 ACACCCTCCCACAAGGACAACCTGTATCAAACGCTTCTGCAACTACAATAACCCCTATGTT 120

← **X87232\_RV**

X87232 ACACCCTCCCACAAGGACAACCTGTACCAAACGCTTCTGCAACTACAATAACCCCTATGTT 120  
 JQ859916 ACACCCTCCCACAAGGACAACCTGTACCAAACGCTTCTGCAACTACAATAACCCCTATGTT 120  
 DQ148297 ACACCCTCCCACAAGGACAACCTGTACCAAACGCTTCTGCAACTACAATAACCCCTATGTT 120  
 X03103 ACACCCTCCCACAAGGACAACCTGTACCAAACGCTTCTGCAACTACAATAACCAATATGTT 120  
 JQ867086 ACACCCTCCTACAAGAACAACAAGATCAAATGCTTCTGCAAGTACAATAACCATTTGTT 120  
 JQ867087 ACACCCTCCTACAAGAACAACAAGATCAAATGCTTCTGCAAGTACAATAACCATTTGTT 120  
 JQ867089 ACACCCTCCTACAAGAACAACAAGATCAAATGCTTGTGCAAGTACAATAACCATTTGTT 120  
 JQ867085 ACACCCTCCTACAAGAACAACAAGATCAAATGCTTCTGCAAGTACAATAACCATTTGTT 120  
 GQ342970 ACACCCTCCTACAAGAACAACAAGATCAAATGCTTCTGCAAGTACAATAACCATTTGTT 120  
 GQ342971 ACACCCTCCTACAAGAACAACAAGATCAAATGCTTCTGCAAGTACAATAACCATTTGTT 120  
 DQ267478 ACACCCTCCTACAAGAACAACAAGATCAAATGCTTCTACAAGTACAATAACCATTTGTT 120  
 GQ342972 ACACCCTCCTACAAGAACAACAAGATCAAATGCTTCTACAAGTACAATAACCATTTGTT 120

**GQ342976\_FW** →

GQ342976 ACACCCTCCTACAAGAACAACAAGATCAAATGCTTCTACAAGTACAATAACCATTTGTT 120  
 GQ342973 ACACCCTCCTACAAGAACAACAAGATCAAATGCTTCTACAAGTACAATAACCATTTGTT 120  
 GQ342975 CCACCCTCCCACAAGGACAACAAGATCAAATGCTTGTGCAAGTACAATAACCATTTGTT 120  
 JQ867088 ACACCCTCCCACAAGGACAACAAGATCAAATGCTTGTGCAAGTACAATAACCATTTGTT 120  
 DQ826387 ACACCCTCCTACAAGAACAACAAGATCAAATGCTTCTGCAAGTACAATAACCATTTGTT 120

\* \* \* \* \*

JQ859917 CATCCATCTATATTGCAACAGCTAAACCCATGCAAGGATTCCTCCAGCAGCAGTGCCAGC 180  
 JQ867075 CATCCATCTATATTGCAACAGCTAAACCCATGCAAGGATTCCTCCAGCAGCAGTGCCAGC 180



JQ867084 GTGTTGCAGCAACAATGTTGCCAGCAACTGCCGCAAATCCCGAACAATTCGCCCATGAG 300  
 DQ178602 GTGTTGCAGCGACAATGTTGCCAGCAACTGCCGCAAATTCGCCAACAATTCGCCCATGAG 300  
 DQ267479 GTGTTGCAGCGACAATGTTGCCAGCAACTGCCGCAAATTCGCCAACAATTCGCCCATGAG 300  
 JQ867073 GTGTTGCAGCAACAATGTTGCCAGCAACTGCCGCAAATCCCGAACAATTCGCCCATGAG 300  
 X87232 GTGTTGCAGCAACAATGTTGCCAGCAACTGCCGCAAATTCGCCAACAATTCGCCCATGAG 300  
 JQ859916 GTGTTGCAGCAACAATGTTGCCAGCAACTGCCGCAAATTCGCCAACAATTCGCCCATGAG 300  
 DQ148297 GTGTTGCAGCAACAATGTTGCCAGCAACTGCCGCAAATTCGCCAACAATTCGCCCATGAG 300  
 X03103 GTGTTGCAGCAACAATGTTGCCAGCAACTACCCCAATTCGCCAACAATTCGGTCATGAG 300

← **B3b\_RV**

JQ867086 GTGTTGCAGCAACAATGTTGCCAACAACACTGCCGCAAATTCGCCAACAATTCGCCCATGAG 300  
 JQ867087 GTGTTGCAGCAACAATGTTGCCAACAACACTGCCGCAAATTCGCCAACAATTCGCCCATGAG 300  
 JQ867089 GTGTTGCAGCAACAATGTTGCCAACAACACTGCCGCAAATTCGCCAACAATTCGCCCATGAG 300  
 JQ867085 GTGTTGCAGCAACAATGTTGCCAACAACACTGCCGCAAATTCGCCAACAATTCGCCCATGAG 300  
 GQ342970 GTGTTGCAGCAACAATGTTGCCAACAACACTGCCGCAAATTCGCCAACAATTCGCCCATGAG 300  
 GQ342971 GTGTTGCAGCAACAATGTTGCCAACAACACTGCCGCAAATTCGCCAACAATTCGCCCATGAG 300  
 DQ267478 GTGTTGCAGCAACAATGTTGCCAACAACACTGCCGCAAATTCGCCAACAATTCGCCCATGAG 300  
 GQ342972 GTGTTGCAGCAACAATGTTGCCAACAACACTGCCGCAAATTCGCCAACAATTCGCCCATGAG 300  
 GQ342976 GTGTTGCAGCAACAATGTTGCCAACAACACTGCCGCAAATTCGCCAACAATTCGCCCATGAG 300  
 GQ342973 GTGTTGCAGCAACAATGTTGCCAACAACACTGCCGCAAATTCGCCAACAATTCGCCCATGAG 300  
 GQ342975 GTGTTGCAGCAACAATGTTGCCAACAACACTGCCGCAAATTCGCCAACAATTCGCCCATGAG 300  
 JQ867088 GTGTTGCAGCAACAATGTTGCCAACAACACTGCCGCAAATTCGCCAACAATTCGCCCATGAG 300  
 DQ826387 GTGTTGCAGCAACAATGTTGCCAACAACACTGCCGCAAATTCGCCAACAATTCGCCCATGAG 300  
 \*\*\*\*\* \*\* \* \*\*\*\*\* \*\*\*\*\* \*\* \*\*\*\*\* \*\*\*\*\* \*\* \*\*\*\*\*

**B1\_FW** →

JQ859917 GCAATCCGTGCAATCGTCTACTCTATCTTTCTGCAAGAACAACCCCAACAGTGGTCCAA 360  
 JQ867075 GCAATCCGTGCAATCGTCTACTCTATCTTTCTGCAAGAACAACCCCAACAGTGGTCCAA 360  
 JQ867074 GCAATCCGTGCAATCGTCTACTCTATCTTTCTGCAAGAACAACCCCAACAGTGGTCCAA 360  
 JQ859915 GCAATCCGTGCAATCGTCTACTCTATCTTTCTGCAAGAACAACCCCAACAGTGGTCCAA 360  
 X53690 GCAATCCGTGCAATCGTCTACTCTATCTTTCTGCAAGAACAACCCCAACAGTGGTCCAA 360  
 JQ867081 GCAATCCGTGCAATCGTCTACTCTATCTTTCTGCAAGAACAACCCCAACAGTGGTCCAA 360  
 JQ867083 GCAATCCGTGCAATCGTCTACTCTATCTTTCTGCAAGAACAACCCCAACAGTGGTCCAA 360  
 JQ867082 GCAATCCGTGCAATCGTCTACTCTATCTTTCTGCAAGAACAACCCCAACAGTGGTCCAA 360

**JQ867084\_FW** →

JQ867084 GCAATCCGTGCAATCGTCTACTCTATCTTTCTGCAAGAACAACCCCAACAGTGGTCCAA 360  
 DQ178602 GCAATCCGTGCAATCGTCTACTCTATCTTTCTGCAAGAACAACCCCAACAGTGGTCCAA 360  
 DQ267479 GCAATCCGTGCAATCGTCTACTCTATCTTTCTGCAAGAACAACCCCAACAGTGGTCCAA 360  
 JQ867073 GCAATCCGTGCAATCGTCTACTCTATCTTTCTGCAAGAACAACCCCAACAGTGGTCCAA 360  
 X87232 GCAATCCGTGCAATCGTCTACTCTATCTTTCTGCAAGAACAACCCCAACAGTGGTCCAA 360  
 JQ859916 GCAATCCGTGCAATCGTCTACTCTATCTTTCTGCAAGAACAACCCCAACAGTGGTCCAA 360  
 DQ148297 GCAATCCGTGCAATCGTCTACTCTATCTTTCTGCAAGAACAACCCCAACAGTGGTCCAA 360  
 X03103 GCAATCCGTGCAATCGTCTATCTATCTTTCTGCAAGAACAACCCCAACAGTGGTCCAA 360

**B3\_FW** →

**B3a\_FW** →

JQ867086 GCAGTCCGTGCAATCGTCTACTCTATCTTTCTGCAAGAACAACCCCAACAGTGGTCCAA 360  
 JQ867087 GCAGTCCGTGCAATCGTCTACTCTATCTTTCTGCAAGAACAACCCCAACAGTGGTCCAA 360  
 JQ867089 GCAGTCCGTGCAATCGTCTACTCTATCTTTCTGCAAGAACAACCCCAACAGTGGTCCAA 360  
 JQ867085 GCAGTCCGTGCAATCGTCTACTCTATCTTTCTGCAAGAACAACCCCAACAGTGGTCCAA 360  
 GQ342970 GCAGTCCGTGCAATCGTCTACTCTATCTTTCTGCAAGAACAACCCCAACAGTGGTCCAA 360  
 GQ342971 GCAGTCCGTGCAATCGTCTACTCTATCTTTCTGCAAGAACAACCCCAACAGTGGTCCAA 360  
 DQ267478 GCAGTCCGTGCAATCGTCTACTCTATCTTTCTGCAAGAACAACCCCAACAGTGGTCCAA 360  
 GQ342972 GCAGTCCGTGCAATCGTCTACTCTATCTTTCTGCAAGAACAACCCCAACAGTGGTCCAA 360  
 GQ342976 GCAGTCCGTGCAATCGTCTACTCTATCTTTCTGCAAGAACAACCCCAACAGTGGTCCAA 360  
 GQ342973 GCAGTCCGTGCAATCGTCTACTCTATCTTTCTGCAAGAACAACCCCAACAGTGGTCCAA 360  
 GQ342975 GCAGTCCGTGCAATCGTCTACTCTATCTTTCTGCAAGAACAACCCCAACAGTGGTCCAA 360  
 JQ867088 GCAGTCCGTGCAATCGTCTACTCTATCTTTCTGCAAGAACAACCCCAACAGTGGTCCAA 360  
 DQ826387 GCAGTCCGTGCAATCGTCTACTCTATCTTTCTGCAAGAACAACCCCAACAGTGGTCCAA 360  
 \*\*\* \*\*\*\*\* \*\* \* \*\*\*\*\* \*\*\*\*\* \*\* \*\*\*\*\* \*\*\*\*\* \*\* \*\*\*\*\*

← **B1a\_RV**

**Common B\_FW** →

JQ859917 GGTGTATCCCAACCCCAACAACAGTTGCAGCAGGAGCAAGTTGGACAATGTTCTTTCCAA 420  
 JQ867075 GGTGTATCCCAACCCCAACAACAGTTGCAGCAGGAGCAAGTTGGACAATGTTCTTTCCAA 420  
 JQ867074 GGTGTATCCCAACCCCAACAACAGTTGCAGCAGGAGCAAGTTGGACAATGTTCTTTCCAA 420  
 JQ859915 GGTGTATCCCAACCCCAACAACAGTTGCAGCAGGAGCAAGTTGGACAATGTTCTTTCCAA 420  
 X53690 GGTGTATCCCAACCCCAACAACAGTTGCAGCAGGAGCAAGTTGGACAATGTTCTTTCCAA 420  
 JQ867081 GGTGTATCCCAACCCCAACAACAGTTGCAGCAGGAGAAAGTTGGACAATGTTCTTTCCAA 420  
 JQ867083 GGTGTATCCCAACCCCAACAACAGTTGCAGCAGGAGAAAGTTGGACAATGTTCTTTCCAA 420  
 JQ867082 GGTGTATCCCAACCCCAACAACAGTTGCAGCAGGAGAAAGTTGGACAATGTTCTTTCCAA 420

**JQ867084\_RV** ←

JQ867084 GGTGTATCCCAACCCCAACAACAGTTGCAGCAGGAGAAAGTTGGACAATGTTCTTTCCAA 420  
 DQ178602 GGTGTATCCCAACCCCAAAAAACAGTTGCAGCAGGAGCAAGTTGGACAATGTTCTTTCCAA 420

DQ267479 GGTGTATCCCAACCCCAAAAAACAGTTGCAGCAGGAGCAAGTTGGACAATGTTCTTTTCCAA 420  
 JQ867073 GGTGTATCCCAACCCCAACAACAGTTGCAGCAGGAGCAAGTTGGACAATGTTATTTTCCAA 420  
 X87232 GGTGCCCTCCCAACCCCAACAACAGTTGCAGGAGGAGCAAGTCGGACAATGTTATTTTCCAA 420  
 JQ859916 GGTGTCTCCCAACCCCAACAACAGTTGCAGCAGGAGCAAGTCGGACAATGTTATTTTCCAA 420  
 DQ148297 GGTGTCTCCCAACCCCAACAACAGTTGCAACAGGAGCAAGTCGGACAATGTTATTTTCCAA 420

**B2\_FW** →

X03103 GGTGTCTCCCAACCCCAACAACAGTTGTCGCAACAGTCGGACAATGTTCTTTTCCAA 420

← **B3\_RV**      ← **B3a\_RV**

JQ867086 GGTGTCTCCCAACCCCAACAACAGTTGCAACAGCAACAAGTCGGACAATGTTCTTTTCCAA 420  
 JQ867087 GGTGTCTCCCAACCCCAACAACAGTTGCAACAGCAACAAGTCGGACAATGTTCTTTTCCAA 420  
 JQ867089 GGTGTCTCCCAACCCCAACAACAGTTGCAACAGCAACAAGTCGGACAATGTTCTTTTCCAA 420  
 JQ867085 GGTGTCTCCCAACCCCAACAACAGTTGCAACAGCAACAAGTCGGACAATGTTCTTTTCCAA 420  
 GQ342970 GGTGTCTCCCAACCCCAACAACAGTTGCAACAGCAACAAGTCGGACAATGTTCTTTTCCAA 420  
 GQ342971 GGTGTCTCCCAACCCCAACAACAGTTGCAACAGCAACAAGTCGGACAATGTTCTTTTCCAA 420  
 DQ267478 GGTGTCTCCCAACCCCAACAACAGTTGCAACAGCAACAAGTCGGACAATGTTCTTTTCCAA 420  
 GQ342972 GGTGTCTCCCAACCCCAACAACAGTTGCAACAGCAACAAGTCGGACAATGTTCTTTTCCAA 420  
 GQ342976 GGTGTCTCCCAACCCCAACAACAGTTGCAACAGCAACAAGTCGGACAATGTTCTTTTCCAA 420  
 GQ342973 GGTATCTCCCAACCCCAACAACAGTTGCAGCTACAGCAAGTCGGACAATGTTCTTTTCCAA 420  
 GQ342975 GGTGTCTCCCAACCCCAACAACAGTTGCAGCTACAGCAAGTCGGACAATGTTCTTTTCCAA 420

**JQ867088\_FW** →

JQ867088 GGTGTCTCCCAACCCCAACAACAGTTGTCGCAACAGTCGGACAATGTTCTTTTCCAA 420  
 DQ826387 GGTGTCTCCCAACCCCAAAAAACAGTTGGGGCAGCAGCAAGTCGGACAATGTTCTTTTCCAA 420  
 \*\*      \* \* \* \* \* \*      \*      \* \* \* \* \* \* \* \* \* \* \* \* \* \* \* \* \* \* \* \* \* \*

JQ859917 CAACCTCAACCACAACAACACTTGGTCAAGCACAACAGGTACCACAAAGTGTTTCTTGCGAG 480  
 JQ867075 CAACCTCAACCACAACAACACTTGGTCAAGCACAACAGGTACCACAAAGTGTTTCTTGCGAG 480  
 JQ867074 CAACCTCAACCACAACAACACTTGGTCAAGCACAACAGGTACCACAAAGTGTTTCTTGCGAG 480  
 JQ859915 CAACCTCAACCACAACAACACTTGGTCAAGCACAACAGGTACCACAAAGTGTTTCTTGCGAG 480  
 X53690 CAACCTCAACCACAACAGTTGGTCAAGCACAACAGGTACCACAAAGTGTTTCTTGCGAG 480  
 JQ867081 CAACCTCAACCACAACAACACTTGGTCAACCACAGCAGGTACCACAAAGTGTTTCTTGCGAG 480  
 JQ867083 CAACCTCAACCACAACAACACTTGGTCAACCACAGCAGGTACCACAAAGTGTTTCTTGCGAG 480  
 JQ867082 CAACCTCAACCACAACAACACTTGGTCAACCACAGCAGGTACCACAAAGTGTTTCTTGCGAG 480  
 JQ867084 CAACCTCAACCACAACAACACTTGGTCAACCACAGCAGGTACCACAAAGTGTTTCTTGCGAG 480  
 DQ178602 CAACCTCAACCACAACAACACTTGGTCAACCACAGCAGGTACCACACAGTGTTTCTTGCGAG 480  
 DQ267479 CAACCTCAACCACAACAACACTTGGTCAACCACAGCAGGTACCACACAGTGTTTCTTGCGAG 480  
 JQ867073 CAACCTCAACCACAACAACACTTGGTCAACCACAACAGGTACCACAGAGTGTTTCTTGCGAG 480  
 X87232 CAACCTCAACCACAACAACACTTGGTCAACCACAACAGGTACCACAGAGTGTTTCTTGCGAG 480  
 JQ859916 CAACCTCAACCACAACAACACTTGGTCAACCACAACAGGTACCACAGAGTGTTTCTTGCGAG 480  
 DQ148297 CAACCTCAACCACAACAG---GGTCAACAACAGCAAGTGCCACAGAGTGTTTCTTGCGAG 477

← **B2\_RV**

X03103 CAACCTCAACCACAACAAGTTGGTCAACAACAACAGTTACCCAGAGTGCTTCTTGCGAG 480  
 JQ867086 CAACCTCAACCACAACAGG---GTCAACAACAGCAAGTGCCACAGAGTGTTCTTGCGAG 477  
 JQ867087 CAACCTCAACCACAACAGG---GTCAACAACAGCAAGTGCCACAGAGTGTTCTTGCGAG 477  
 JQ867089 CAACCTCAACCACAACAGG---GTCAACAACAGCAAGTGCCACAGAGTGTTCTTGCGAG 477  
 JQ867085 CAACCTCAACCACAGCAGG---GTCAACAACAGCAAGTGCCACAGAGTGTTCTTGCGAG 477  
 GQ342970 CAACCTCAACCACAACAGG---GTCAACAACAGCAAGTGCCACAGAGTGTTTCTTGCGAG 477  
 GQ342971 CAACCTCAACCACAACAGG---GTCAACAACAGCAAGTGCCACAGAGTGTTTCTTGCGAG 477  
 DQ267478 CAACCTCAACCACAACAGG---GTCAACAACAGCAAGTGCCACAGAGTGTTTCTTGCGAG 477  
 GQ342972 CAACCTCAACCACAACAGG---GTCAACAACAGCAAGTGCCACAGAGTGTTTCTTGCGAG 477  
 GQ342976 CAACCTCAACCACAACAGG---GTCAACAACAGCAAGTGCCACAGAGTGTTTCTTGCGAG 477

**B3c\_FW** →

GQ342973 CAACCTCAACCACAACAGG---GTCAACAACAGCAAGTGCCACAAAGTGTTTCTTGCGAG 477  
 GQ342975 CAACCTCAACCACAACAGG---GTCAACAACAGCAAGTGCCACAAAGTGTTTCTTGCGAG 477  
 JQ867088 CAACCTCAACCACAACAGG---GTCAACAACAGCAAGTGCCACAGAGTGTTTCTTGCGAG 477

**DQ826387\_FW** →

DQ826387 CAACCTCAACCACAACAAGTTGGTCAACAACAACAGGTACCACAGAGTGCTTCTTGCGAG 480  
 \* \* \* \* \* \* \* \* \* \* \* \* \* \* \* \* \* \* \* \* \* \* \* \* \* \* \* \* \* \* \* \* \* \* \* \* \* \* \* \*

← **Common B\_RV/B1\_RV**

JQ859917 CCACACCAGATAGCTCAGCTTGAGGGGACGACTTCCATTGCGCTGCGTACCCTACCAAGG 540  
 JQ867075 CCACACCAGATAGCTCAGCTTGAGGGGACGACTTCCATTGCGCTGCGTACCCTACCAAGG 540  
 JQ867074 CCACACCAGATAGCTCAGCTTGAGGGGACGACTTCCATTGCGCTGCGTACCCTACCAAGG 540  
 JQ859915 CCACACCAGATAGCTCAGCTTGAGGGGACGACTTCCATTGCGCTGCGTACCCTACCAAGG 540  
 X53690 CCACACCAGATAGCTCAGCTTGAGGGGACGACTTCCATTGCGCTGCGTACCCTACCAAGG 540  
 JQ867081 CCACACCAGATAGCTCAGCTTGAGGGGACGACTTCCATTGCGCTGCGTACCCTACCAAGG 540  
 JQ867083 CCACACCAGATAGCTCAGCTTGAGGGGACGACTTCCATTGCGCTGCGTACCCTACCAAGG 540  
 JQ867082 CCACACCAGATAGCTCAGCTTGAGGGGACGACTTCCATTGCGCTGCGTACCCTACCAAGG 540  
 JQ867084 CCACACCAGATAGCTCAGCTTGAGGGGACGACTTCCATTGCGCTGCGTACCCTACCAAGG 540  
 DQ178602 CCACACCAGATAGCTCAGCTTGAGGGGACGACTTCCATTGCGCTGCGTACCCTACCAAGG 540

```
DQ267479 CCACACCAGATAGCTCAGCTTGAGGCGACGACTTCCATTGCGCTGCGTACCCCTACCAAGG 540
JQ867073 CCACACCAGATAGCTCAGCTTGAGGCGACGACTTCCATTGCGCTGCGTACCCCTACCAACG 540
X87232 CCACACCAGATAGCTCAGCTTGAGGCGACGAAATCCATTGCGCTGCGTACCCCTACCAACG 540
JQ859916 CCACACCAGATAGCTCAGCTTGAGGCGACGACTTCCATTGCGCTGCGTACCCCTACCAACG 540
```

DQ148297\_FW

```
DQ148297 CCACACCAGATAGCTCAGCTTGAGGCGACGCTTCCATTGCGCTGCGTACCCCTACCAATG 537
X03103 CCACACCAGATAGCTCAGCTTGAGGCGACGACTTCCATTGCGCTGCGTACCCCTACCAATG 540
JQ867086 CCACACCAAATAGCTCAACTTGAGGCGACAACCTCCATTGCGCTGCGTACCCCTACCAACG 537
JQ867087 CCACACCAAATAGCTCAACTTGAGGCGACAACCTCCATTGCGCTGCGTACCCCTACCAACG 537
JQ867089 CCACACCAAATAGCTCAACTTGAGGCGACAACCTCCATTGCGCTGCGTACCCCTACCAACG 537
JQ867085 CCACACCAAATAGCTCAACTTGAGGCGACAACCTCCATTGCGCTGCGTACCCCTACCAACG 537
GQ342970 CCACACCAAATAGCTCAACTTGAGGCGACAACCTCCATTGCGCTGCGTACCCCTACCAACG 537
GQ342971 CCACACCAAATAGCTCAACTTGAGGCGACAACCTCCATTGCGCTGCGTACCCCTACCAACG 537
DQ267478 CCACACCAAATAGCTCAACTTGAGGCGACAACCTCCATTGCGCTGCGTACCCCTACCAACG 537
GQ342972 CCACACCAAATAGCTCAACTTGAGGCGACAACCTCCATTGCGCTGCGTACCCCTACCAACG 537
GQ342976 CCACACCAAATAGCTCAACTTGAGGCGACAACCTCCATTGCGCTGCGTACCCCTACCAACG 537
```

B3c\_RV

```
GQ342973 CCACACCAGCTAGCTCAGCTTGAGGCGACGGCTTCCATTGCGCTGCGTACCCCTACCAATG 537
GQ342975 CCACACCAGCTAGCTCAGCTTGAGGCGACGGCTTCCATTGCGCTGCGTACCCCTACCAATG 537
```

JQ867088\_RV

```
JQ867088 CCACTCCAGCTAGCTCAGCTTGAGGCGACGGCTTCCATTGCGCTGCGTACCCCTACCAATG 537
DQ826387 CCACACCAGATAGCTCAGCTTGAGGCGACGACTTCCATTGCGCTGCGTACCCCTACCAACG 540
**** * * * * * * * * * * * * * * * * * * * * * * * * * * * * * * * * * *
```

```
JQ859917 ATGTGCAATGTTAATGTGCCATTGTACGACATCATGCCACCCGACTTTTGCCACTAG--- 597
JQ867075 ATGTGCAATGTTAATGTGCCATTGTACGACATCATGCCACCCGACTTTTGCCACTAG--- 597
JQ867074 ATGTGCAATGTTAATGTGCCATTGTACGACATCATGCCACCCGACTTTTGCCACTAG--- 597
JQ859915 ATGTGCAATGTTAATGTGCCATTGTACGACATCATGCCACCCGACTTTTGCCACTAG--- 597
X53690 ATGTGCAATGTTAATGTGCCATTGTACGACATCATGCCACCCGACTTTTGCCACTAG--- 597
JQ867081 ATGTGCAATGTTAATGTGCCATTGTACGACATCATGCCACCCGACTTTTGCCACTAG--- 597
JQ867083 ATGTGCAATGTTAATGTGCCATTGTACGACATCATGCCACCCGACTTTTGCCACTAG--- 597
JQ867082 ATGTGCAATGTTAATGTGCCATTGTACGACATCATGCCACCCGACTTTTGCCACTAG--- 597
JQ867084 ATGTGCAATGTTAATGTGCCATTGTACGACATCATGCCACCCGACTTTTGCCACTAG--- 597
DQ178602 ATGTGCAATGTTAATGTGCCATTGTACGACATCATGCCAGTCGACTTTTGCCACTAG--- 597
DQ267479 ATGTGCAATGTTAATGTGCCATTGTACGACATCATGCCAGTCGACTTTTGCCACTAG--- 597
JQ867073 ATGTGCAATGTTAATGTGCCATTGTATGACATCATGCCATTGGCGTT-GGCACTAGAGT 599
X87232 ATGTGCAATGTTAATGTGCCATTGTATGACATCATGCCATTGGCGTT-GGCACTAGAGT 599
JQ859916 ATGTGCAATGTTAATGTGCCATTGTATGACATCATGCCATTGGCGTT-GGCACTAGAGT 599
```

DQ148297\_RV

```
DQ148297 ATGTGTAGTGTAAATGTGCCGTTCTACCGCATACTTCCATTCGGCATT-GACACGAGAGT 596
X03103 ATGTGCAAGTGTAAATGTGCCGTTGTACAGGATCCTGCGA---GGCGTT-GGCCCCAGTGT 596
JQ867086 ATGTGCAAGTGTAAATGTGCCGTTGTACCGCATACTGCCATTAGCCATT-GACACGAGAGT 596
JQ867087 ATGTGCAAGTGTAAATGTGCCGTTGTACCGCATACTGCCATTAGCCATT-GACACGAGAGT 596
JQ867089 ATGTGTAGTGTAAATGTGCCGTTGTACCGCATACTGCCATTAGCCATT-GACACGAGAGT 596
JQ867085 ATGTGCAAGTGTAAATGTGCCGTTGTACCGCATACTGCCATTAGCCATT-GACACGAGAGT 596
GQ342970 ATGTGCAAGTGTAAATGTGCCGTTGTACCGCATACTGCCATTAGCCATT-GACACGAGAGT 596
GQ342971 ATGTGCAAGTGTAAATGTGCCGTTGTACCGCATACTGCCATTAGCCATT-GACACGAGAGT 596
DQ267478 ATGTGCAAGTGTAAATGTGCCGTTGTACCGCATACTGCCATTAGCCATT-GACACGAGAGT 596
GQ342972 ATGTGCAAGTGTAAATGTGCCGTTGTACCGCATACTGCCATTAGCCATT-GACACGAGAGT 596
GQ342976 ATGTGCAAGTGTAAATGTGCCGTTGTACCGCATACTGCCATTAGCCATT-GACACGAGAGT 596
GQ342973 ATGTGCAAGTGTAAATGTGCCGTTGTACCGCATACTTCCATTCGGCATT-GACACGAGAGT 596
GQ342975 ATGTGCAAGTGTAAATGTGCCGTTGTACCGCATACTTCCATTCGGCATT-GACACGAGAGT 596
JQ867088 ATGTGCAAGTGTAAATGTGCCGTTCTACCGCATACTTCCATTCGGCATT-GACACGAGAGT 596
```

DQ826387\_RV

```
DQ826387 ATGTGCAAGTGTAAATGTGCCGTTCTACCGCATACTTCCATTCGGCATT-GACACGAGAGT 596
***** * * * * * * * * * * * * * * * * * * * * * * * * * * * * * * * * * *
```

JQ859917 -----
JQ867075 -----
JQ867074 -----
JQ859915 -----
X53690 -----
JQ867081 -----
JQ867083 -----
JQ867082 -----
JQ867084 -----
DQ178602 -----
DQ267479 -----
JQ867073 TGATGTCTAA 609
X87232 TGGTGTCTAA 609

JQ859916 TGATGTCTAA 609  
 DQ148297 TGGTGTCTAA 606  
 X03103 TGGTGTCTAA 606  
 JQ867086 TGGTGTCTAA 606  
 JQ867087 TGGTGTCTAA 606  
 JQ867089 TGGTGTCTAA 606  
 JQ867085 TGGTGTCTAA 606  
 GQ342970 TGGTGTCTAA 606  
 GQ342971 TGGTGTCTAA 606  
 DQ267478 TGGTGTCTAA 606  
 GQ342972 TGGTGTCTAA 606  
 GQ342976 TGGTGTCTAA 606  
 GQ342973 TGGTGTCTAA 606  
 GQ342975 TGGTGTCTAA 606  
 JQ867088 TGGTGTCTAA 606  
 DQ826387 TGGTGTCTAA 606

**C**

X60037 -----ACCGCAAAAACCATTTCC-----AGTGC-AGCAACCGTTTCAC-- 37  
 JQ867090 CCTGCAACCCCAACCACCACAACAACCTTTTCCT---CAGTCCCAACAACCATTTCAGCTG 57  
 S66938 -----TCGGCCCCAACAACCATTTCCCTTGGAACCACAACAACCATTTTCCC-- 46  
 \* \* \* \* \*

X60037 ACA-CCCAACAAT-ATTTCCCTATCTACCAGAGGAATTGTTTCCCAATATC---AAA 92  
 JQ867090 GCAACCACAACAACCATTTTCCAGCC--CCAAC--AACCAGTTCCCAACAACCACAAC 113  
 S66938 -CAGCCCCAACAACCAATT-CCCTACCAACCACAACAACCATTCAACCAGCAACCACAAC 104  
 \* \* \* \* \*

X60037 TACCAACCCCTTACAACCACAACAACCATTTCCCAACAACCACAACAACCTTTCCTC 152  
 JQ867090 AACCGTTCCTCCAGCAACCACAACAACCATTTCCCTTGGAACCACAACAACCATTTCCGC 173  
 S66938 AAATAATATCCAGCAACCACAACAACCATTTCCCAACAACCACAACAACCTTTTCCCTC 164  
 \* \* \* \* \*

X60037 GGCCCCAACAACCATTTCCCTTGGAACCACAACAACCATT-----TCCC----CAGCCCC 203  
 JQ867090 AGCCCCAACAACCAATTGCGCACCAACCACAACAACCATTCTCGTTCTCGCAGCAACCAC 233

S66938 AGCCCCAACAACCATTTCCCTTGGAACCACAACAACCATT-----TCCC----CAGCC**TC** 215  
 \* \* \* \* \* **S66938\_FW** →

X60037 AAGAACCAATTCCCAAGCAACCACAACAACCATTTCCACAGCAACCACAACAACCATTCC 263  
 JQ867090 AACCAACCATTTCCCTCTGCAACCGCAACAATCATTTCCCAACAACCACAACAACCATTTC 293

S66938 **AACAACCATTTCCCTT**GCAACCACAACAACCATTTCCCT**TC**GCAACCACAACAACCATTTTC 275  
 \* \* \* \* \* ← **S66938\_RV**

X60037 CACAGCAACCACAACAATAATTTTCCAGCAACCCCAACAATCATACCTGT-----GC 317  
 JQ867090 CCCAACAACCACAACAATAATTTTCCAGCAACCCCAACAATCATACCTGT-----GC 347  
 S66938 C---GCAGCCCCAACAACCTATGCGCACCAACCACAACAACCATTTCTCGTTCTCGCAGC 332  
 \* \* \* \* \*

X60037 AACCTCAACAGCCATTTCTC---AAC**CTCAAC**---CAGTCCCCCAGCAGCGACCCCAAC 371  
 JQ867090 AACCTCAACAGCCATTTCTC---AACCTCAAC---CAGTCCCCCAGCAGCGACCCCAAC 401  
 S66938 AACCAACAACAACCATTTCCCTCTGCAACCGCAACAACCATTTCCCAACAACA---ACCACAAC 389  
 \* \* \* \* \*

X60037 AAGCATCCCCCTTACA**ACCGCAAC****CCCAACAAG**CATCCCCCTTACAACCGCAACAACCAT 431  
 JQ867090 AAGCATCCCCCTTACAACCGCAAC-----AACCAT 431  
 S66938 AACCATTTCCCAACAACCACAAC-----AAATAA 419  
 \* \* \* \* \*

**C1\_FW** →

← **C1\_RV**



D82941 AAGGGCAAAAAGGATACTACCCAAGTGAATTTCTCCGCAGCAGTCAGGACAAGGACAAC 420  
\*\*\*\*\*

JQ867076 AAGGATACCAGCCTAGTGGAGCTTCTTCACAGGGGTCGGTGCAAGGGGCGTGCCAGCACA 360  
JQ867091 AAGGATACCAGCCTAGTGGAGCTTCTTCACAGGGGTCGGTGCAAGGGGCGTGCCAGCACA 360  
AY268139 AAGGATACCAGCCTAGTGGAGCTTCTTCACAGGGGTCGGTGCAAGGGGCGTGCCAGCACA 330  
JQ867077 AAGGATACCAGCCTAGTGGAGCTTCTTCACAGGGGTCGGTGCAAGGGGCGTGCCAGCACA 420  
D82941 AAGGATACCAGCCTAGTGGAGCTTCTTCACAGGGGTCGGTGCAAGGGGCGTGCCAGCACA 480  
\*\*\*\*\*

JQ867076 GCACATCTTCTCCGCAGCAGCAAGCACAAGGGTGCCAAGCTTCTTCACCAAAGCAAGGGC 420  
JQ867091 GCACATCTTCTCCGCAGCAGCAAGCACAAGGGTGCCAAGCTTCTTCACCAAAGCAAGGGC 420  
AY268139 GCACATCTTCTCCGCAGCAGCAAGCACAAGGGTGCCAAGCTTCTTCACCAAAGCAAGGGC 390  
JQ867077 GCACATCTTCTCCGCAGCAGCAAGCACAAGGGTGCCAAGCTTCTTCACCAAAGCAAGGGC 480  
D82941 GCACATCTTCTCCGCAGCAGCAAGCACAAGGGTGCCAAGCTTCTTCACCAAAGCAAGGGC 540  
\*\*\*\*\*

JQ867076 TAGGGTCGTTGTACTACCCGAGTGGAGCTTATACACAACAGAAACCAGGGCAAGGGTACA 480  
JQ867091 TAGGGTCGTTGTACTACCCGAGTGGAGCTTATACACAACAGAAACCAGGGCAAGGGTACA 480  
AY268139 TAGGGTCGTTGTACTACCCGAGTGGAGCTTATACACAACAGAAACCAGGGCAAGGGTACA 450  
JQ867077 TAGGGTCGTTGTACTACCCGAGTGGAGCTTATACACAACAGAAACCAGGGCAAGGGTACA 540  
D82941 TAGGGTCGTTGTACTACCCGAGTGGAGCTTATACACAACAGAAACCAGGGCAAGGGTACA 600  
\*\*\*\*\*

JQ867076 ACCCAGGTGGAACCTTCTCCGCTGCACCAGCAAGGGGGAGGGTTCCGGCGGCGGGTTAACGA 540  
JQ867091 ACCCAGGTGGAACCTTCTCCGCTGCACCAGCAAGGGGGAGGGTTCCGGCGGCGGGTTAACGA 540  
AY268139 ACCCAGGTGGAACCTTCTCCGCTGCACCAGCAAGGGGGAGGGTTCCGGCGGCGGGTTAACGA 510  
JQ867077 ACCCAGGTGGAACCTTCTCCGCTGCACCAGCAAGGGGGAGGGTTCCGGCGGCGGGTTAACGA 600  
D82941 ACCCAGGTGGAACCTTCTCCGCTGCACCAGCAAGGGGGAGGGTTCCGGCGGCGGGTTAACGA 660  
\*\*\*\*\*

JQ867076 CGGAGCAACCGCAGGGAGGAAAGCAGCCATTCCATTGCCAGCAAACCACTGTCTCCCTC 600  
JQ867091 CGGAGCAACCGCAGGGAGGAAAGCAGCCATTCCATTGCCAGCAAACCACTGTCTCCCTC 600  
AY268139 CGGAGCAACCGCAGGGAGGAAAGCAGCCATTCCATTGCCAGCAAACCACTGTCTCCCTC 570  
JQ867077 CGGAGCAACCGCAGGGAGGAAAGCAGCCATTCCATTGCCAGCAAACCACTGTCTCCCTC 660  
D82941 CGGAGCAACCGCAGGGAGGAAAGCAGCCATTCCATTGCCAGCAAACCACTGTCTCCCTC 720  
\*\*\*\*\*

JQ867076 ACCAGGGTCAGCAAACCACTGTCTCCCTCATCAGGGTCAGCAAACCACTGTCTCCCTC 660  
JQ867091 ACCGGGGTCAGCAAACCACTGTCTCCCTCATCAGGGTCAGCAAACCACTGTCTCCCTC 660  
AY268139 ACCAGGGTCAGCAAACCACTGTCTCCCTCATCAGGGTCAGCAAACCACTGTCTCCCTC 630  
JQ867077 ACCAGGGTCAGCAAACCACTGTCTCCCTCATCAGGGTCAGCAAACCACTGTCTCCCTC 720  
D82941 ACCAGGGTCAGCAAACCACTGTCTCCCTCATCAGGGTCAGCAAACCACTGTCTCCCTC 780  
\*\*\* \*\*\*\*\*

JQ867076 ATCAGGGTCAGCAAACCACTGTCTCCCTCACCAGGGTCAGCAAACCACCGTCTCCCTC 720  
JQ867091 ATCAGGGTCAGCAAACCACTGTCTCCCTCACCAGGGTCAGCAAACCACCGTCTCCCTC 720  
AY268139 ATCAGGGTCAGCAAACCACGGTCTCCCTCACCAGGGTCAGCAAACCACCGTCTCCCTC 690  
JQ867077 ATCAGGGTCAGCAAACCAC----- 739  
D82941 ATCAGGGTCAGCAAACCAC----- 799  
\*\*\*\*\*

JQ867076 ACCAGGGTCAGCAAACCACCGTCTCCCTCATCAGGGTCAGCAAACCACTGTCTCCCTC 780  
JQ867091 ACCAGGGTCAGCAAACCACCGTCTCCCTCATCAGGGTCAGCAAACCACTGTCTCCCTC 780  
AY268139 ACCAGGGTCAGCAAACCACCGTCTCCCTCATCAGGGTCAGCAAACCACTGTCTCCCTC 750  
JQ867077 -----CGTCTCCCTCATCAGGGTCAGCAAACCACTGTCTCCCTC 780  
D82941 -----TGCTCCCTCACCAGGGTCAGCAAACCACCGTCTCCCTC 840  
\*\*\*\*\*

JQ867076 ATCCGGGTCAGCAAACCACTGTCTCCCTCATCAGGGTCAGCAAACCACTGTCTCCCTC 840  
JQ867091 ATCCGGGTCAGCAAACCACTGTCTCCCTCATCAGGGTCAGCAAACCACTGTCTCCCTC 840  
AY268139 ATCCGGGTCAGCAAACCACTGTCTCCCTCATCAGGGTCAGCAAACCACTGTCTCCCTC 810  
JQ867077 ATCCGGGTCAGCAAACCACTGTCTCCCTCATCAGGGTCAGCAAACCACTGTCTCCCTC 840  
D82941 ACCAGGGTCAGCAAACCACCGTCTCCCTCATCAGGGTCAGCAAACCACTGTCTCCCTC 900  
\* \* \*\*\*\*\*

JQ867076 ATCCGGGTCAGCAAACCACTGTCTCCCTCATCAGGGTCAGCAAACCACTGTCTCCCTC 900  
JQ867091 ATCCGGGTCAGCAAACCACTGTCTCCCTCATCAGGGTCAGCAAACCACTGTCTCCCTC 900  
AY268139 ATCCGGGTCAGCAAACCACTGTCTCCCTCATCAGGGTCAGCAAACCACTGTCTCCCTC 870  
JQ867077 ATCCGGGTCAGCAAACCACTGTCTCCCTCATCAGGGTCAGCAAACCACTGTCTCCCTC 900  
D82941 ATCCGGGTCAGCAAACCAC----- 919



```

*****
JQ867076   ATCAGGGTCAGCAAACCAC-----CGTCTCCCCTC 930
JQ867091   ATCAGGGTCAGCAAACCAC-----CGTCTCCCCTC 930
AY268139   ATCAGGGTCAGCAAACCACACTGTCTCCCCTCATCAGGGTCAGCAAACCACCGTCTCCCCTC 930
JQ867077   ATCAGGGTCAGCAAACCAC-----CGTCTCCCCTC 930
D82941     -----CGTCTCCCCTC 930
                                              *****

JQ867076   ATCAGGGTCAGCAAACCACCGTCTCCCCTCATCAGGGTCAGCAAACCACCGTCTCCCCTC 990
JQ867091   ATCAGGGTCAGCAAACCACCGTCTCCCCTCATCAGGGTCAGCAAACCACCGTCTCCCCTC 990
AY268139   ATCAGGGTCAGCAAACCACCGTCTCCCCTCATCAGGGTCAGCAAACCACCGTCTCCCCTC 990
JQ867077   ATCAGGGTCAGCAAACCACCGTCTCCCCTCATCAGGGTCAGCAAACCACCGTCTCCCCTC 990
D82941     ATCAGGGTCAGCAAACCACCGTCTCCCCTCATCAGGGTCAGCAAACCACCGTCTCCCCTC 990
*****

                                          Common D_FW →
JQ867076   ATCAGGGTCAGCAGCCCGCGGCGAGCAGCCTTGCGGTTTCCCTGGCCAGCAAACCACCGTGT 1050
JQ867091   ATCAGGGTCAGCAGCCCGCGGCGAGCAGCCTTGCGGTTTCCCTGGCCAGCAAACCACCGTGT 1050
AY268139   ATCAGGGTCAGCAGCCCGCGGCGAGCAGCCTTGCGGTTTCCCTGGCCAGCAAACCACCGTGT 1050
JQ867077   ATCAGGGTCAGCAGCCCGCGGCGAGCAGCCTTGCGGTTTCCCTGGCCAGCAAACCACCGTGT 1050
D82941     ATCAGGGTCAGCAGCCCGCGGCGAGCAGCCTTGCGGTTTCCCTGGCCAGCAAACCACCGTGT 1050
*****

                          ← Common D_RV
JQ867076   CTCTGCACCATGGTCAGCAGTCCAACGAGTTGTA ACTACGGCAGCCCATACCATGTTAGCG 1110
JQ867091   CTCTGCACCATGGTCAGCAGTCCAACGAGTTGTA ACTACGGCAGCCCATACCATGTTAGCG 1110
AY268139   CTCTGCACCATGGTCAGCAGTCCAACGAGTTGTA ACTACGGCAGCCCATACCATGTTAGCG 1110
JQ867077   CTCTGCACCATGGTCAGCAGTCCAACGAGTTGTA ACTACGGCAGCCCATACCATGTTAGCG 1110
D82941     CTCTGCACCATGGTCAGCAGTCCAACGAGTTGTA ACTACGGCAGCCCATACCATGTTAGCG 1110
*****

JQ867076   TGGAGCAGCCGTGCGCCAGCCTAAAGGTAGCAAAGGGCGCAGCAGCTCGCGGCGCAGCTGC 1170
JQ867091   TGGAGCAGCCGTGCGCCAGCCTAAAGGTAGCAAAGGGCGCAGCAGCTCGCGGCGCAGCTGC 1170
AY268139   TGGAGCAGCCGTGCGCCAGCCTAAAGGTAGCAAAGGGCGCAGCAGCTCGCGGCGCAGCTGC 1170
JQ867077   TGGAGCAGCCGTGCGCCAGCCTAAAGGTAGCAAAGGGCGCAGCAGCTCGCGGCGCAGCTGC 1170
D82941     TGGAGCAGCCGTGCGCCAGCCTAAAGGTAGCAAAGGGCGCAGCAGCTCGCGGCGCAGCTGC 1170
*****

JQ867076   CGGCAATGTGTGCGCTGGAGGGCGGGCGGGCGGCTGTTGGCCAGCCAGTAG 1220
JQ867091   CGGCAATGTGCGCGCTGGAGGGCGGGCGGGCGGCTGTTGGCCAGCCAGTAG 1220
AY268139   CGGCAATGTGTGCGCTGGAGGGCGGGCGGGCGGCTGTTGGCCAGCCAGTAG 1220
JQ867077   CGGCAATGTGTGCGCTGGAGGGCGGGCGGGCGGCTGTTGGCCAGCCAGTAG 1220
D82941     CGGCAATGTGTGCGCTGGAGGGCGGGCGGGCGGCTGTTGGCCAGCCAGTAG 1220
***** *

γ

JQ867078   CCAGCGGCACTAC---TACCATTACTCACCGTTCCCTAACATTTCCCAGCAACTACT 57
X13508     CCAACGGCACTAC---TACCATTACTCACCGTTCCCTAACATTTCCCAGCAACTACT 57
AJ580585   CCAACGGCACTAC---TACCATTACTCACCGTTCCCTAACATTTCCCAGCAACTACT 57
JQ867079   CCAACGGCACTAC---TACCGTTTACCCACCGTTCCCTAACATTTCCCAGCAACTACT 57
X72628     ACAATTTCCGCAAGCAGATGCCACT---CCAGCCGCAACAACAATTTCCGCAAGCAGATGCC 57
JQ867080   TCAATTTCCACAGCAGTGCAC-----AACAACAATTTCCGCAAGCAGATGCC 48
          **   * * * * * * * * * * * * * * * * * * * * * *

JQ867078   CCCTCAGCCACCACCAATCATTTCCCCAGCCCCGCAATCATAACC--TCAGCCACCG 115
X13508     CCCTCAGCCACCACCAATCATTTCCCCAGCCCCGCAATCATAACC--TCAGCCACCG 115
AJ580585   CCCTCAGCCACCACCAATCATTTCCCCAGCCCCGCAATCATAACC--TCAGCCACCG 115
JQ867079   CCCTCAGCCACCACCAATCATTTCCCCAGCCCCGCAATCATAACC--TCAGCCACCG 115
X72628     ACTCCAGCCGCAACAACAACA-----CAATTTCCGCAACAACAACAATTTGGCCAAATA 111
JQ867080   ACTCCAGCCGCAACAACAACA-----CAATTTCCGCAACAACAACAATTTGGCCAAATA 120
          *   ***** * * * * * * * * * * * * * * * * * * * * *

JQ867078   TTA-CAACCTTTTTCCTCAGCCCCCGCAACAAAAATATCCCAGCAACCACAACAACCATT 174
X13508     TTA-CAACCTTTTTCCTCAGCCCCCGCAACAAAAATATCCCAGCAACCACAACAACCATT 174
AJ580585   TTA-CAACCTTTTTCCTCAGCCCCCGCAACAAAAATATCCCAGCAACCACAACAACCATT 174
JQ867079   TTA-CAACCTTTTTCCTCAGCCCCCGCAACAAAAATATCCCAGCAACCACAACAACCATT 174
X72628     TCAACAACCATT-----AA-----CACAACAACCATAATCC---GCA---ACAGCAACCATT 156
JQ867080   TCAACAACCATT-----AA-----CACAACAACCATAATCC---GCA---ACAGCAACCATT 147

```



X13508 GCAGTCCGTTCCATCCATGTGCAACTTTAATGTCCCACCTAACTGCTCCACCATCAAAGC 609  
 AJ580585 GCAGTCCGTTCCATCCATGTGCAACTTTAATGTCCCACCTAACTGCTCCACCATCAAAGC 609  
 JQ867079 GCAGTCCGTTCCATCCATGTGCAACTTTAATGTCCCACCTAACTGCTCCACCATCAAAGC 609

← **Common  $\gamma$ 3\_RV**

X72628 TCAGACACTTCCTATGTTATGCAATGTGCATGTCCCACCTTATTGCT-----C 609  
 JQ867080 TCAGACACTTCCTATGTTATGCAATGTGCATGTCCCACCTTATTGCT-----C 609  
 \*\*\* \* \*\*\*\* \* \*\*\*\*\* \* \*\*\*\*\* \* \*\*\*\*

← **Common  $\gamma$ 1\_RV**

JQ867078 ACCATTGTTGTTGTTAGTCACCGGTGTTGGAGGACAATGA 649  
 X13508 ACCATTGTTGTTGTTAGTCACCGGTGTTGGAGGACAATGA 649  
 AJ580585 ACCATTGTTGTTGTTAGTCACCGGTGTTGGAGGACAATA 649  
 JQ867079 ACCATTGTTGTTGTTAGTCACCGGTGTTGGAGGACAATGA 649  
 X72628 ACCATTGGTAGCATGGCTACCGGCAGTGGTGGCCAATGA 649  
 JQ867080 ACCATTGGTAGCATGGCTACCGGCAGTGGTGGCCAATGA 649  
 \*\*\*\*\* \* \* \* \* \*\*\*\*\* \*\*\* \*\* \*\*\*\*\* \*
