# Supplementary material for: Quantitative RT-PCR based platform for rapid quantification of the transcripts of highly homologous multigene families and their members during grain development
Source: PubMed Central journal article supplement (PMC3492166; doi:10.1186/1471-2229-12-184), 2012-10-09
Supplement: 1471-2229-12-184-S2.pdf [file 1471-2229-12-184-S2.pdf]

| Primer                             | Normalised amount of hordein group (amol of hordein/amol of actin) |         |         |         |
|------------------------------------|--------------------------------------------------------------------|---------|---------|---------|
|                                    | 10 DAP                                                             | 15 DAP  | 18 DAP  | 25 DAP  |
| <b>Common B</b>                    | 341.55                                                             | 2239.68 | 1773.93 | 2695.45 |
| B1                                 | 144.35                                                             | 915.85  | 638.80  | 530.90  |
| B1a                                | ND                                                                 | ND      | ND      | ND      |
| X87232                             | 50.67                                                              | 319.79  | 221.24  | 249.83  |
| JQ867084                           | ND                                                                 | ND      | ND      | ND      |
| DQ148297                           | ND                                                                 | ND      | ND      | ND      |
| B2                                 | 1.64                                                               | 10.38   | 8.84    | 6.24    |
| B3                                 | 144.82                                                             | 616.98  | 624.04  | 1131.05 |
| B3a                                | 0.83                                                               | 3.69    | 3.72    | 3.10    |
| B3b                                | 85.56                                                              | 399.93  | 409.81  | 930.36  |
| B3c                                | ND                                                                 | ND      | ND      | ND      |
| DQ826387                           | 0.78                                                               | 8.03    | 10.24   | 33.10   |
| GQ342976                           | 0.20                                                               | 0.40    | 0.35    | 0.81    |
| JQ867088                           | ND                                                                 | ND      | ND      | ND      |
| <b>Common C</b>                    | 23.62                                                              | 135.18  | 144.92  | 292.33  |
| C1                                 | 0.21                                                               | 2.07    | 2.49    | 6.16    |
| S66938                             | 15.87                                                              | 119.96  | 111.61  | 191.89  |
| <b>Common D</b>                    | 6.37                                                               | 67.42   | 54.44   | 63.46   |
| <b>Common <math>\gamma</math>1</b> | 16.58                                                              | 48.68   | 64.78   | 52.50   |
| AJ580585                           | ND                                                                 | ND      | ND      | ND      |
| X13508                             | ND                                                                 | ND      | ND      | ND      |
| <b>Common <math>\gamma</math>3</b> | 24.07                                                              | 130.53  | 160.44  | 247.57  |
| X72628                             | ND                                                                 | ND      | ND      | ND      |
| JQ867080                           | ND                                                                 | ND      | ND      | ND      |

ND- not detected
